# Supplementary material
Source: Royal Society of Chemistry journal article supplement (doi:10.1039/d6eb00059b)
Supplement: d6eb00059b1.pdf [file d6eb00059b1.pdf]

Supporting Information for

**Comprehensive Insight into the Synthesis, Structure, Stability, and Ionic Conductivity of  $\text{Na}_5\text{MSi}_4\text{O}_{12}$  type Solid Electrolytes for Solid-State Sodium Batteries**

Anna Michalak<sup>a</sup>, Urvashi Urvashi<sup>a</sup>, Tom Dunlop<sup>b</sup>, Oliver Clemens<sup>c</sup>, M. Anji Reddy<sup>a, \*</sup>

<sup>a</sup> IMPACT Energy Storage Laboratory, Faculty of Science and Engineering, Swansea University, Swansea, UK

<sup>b</sup> SPECIFIC, Faculty of Science and Engineering, Swansea University, Swansea, UK

<sup>c</sup> Materials Design by Synthesis Group, Technische Universität Darmstadt, Darmstadt, Germany

\*Email: [a.r.munnangi@swansea.ac.uk](mailto:a.r.munnangi@swansea.ac.uk)

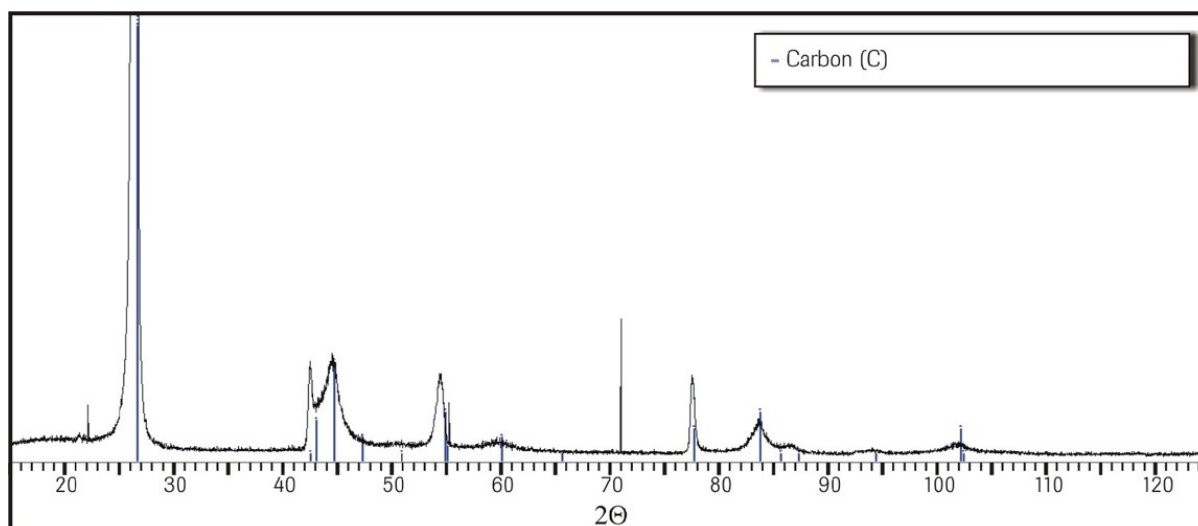

**Figure S1:** XRD patterns of the graphite dome used for in-situ high temperature measurements

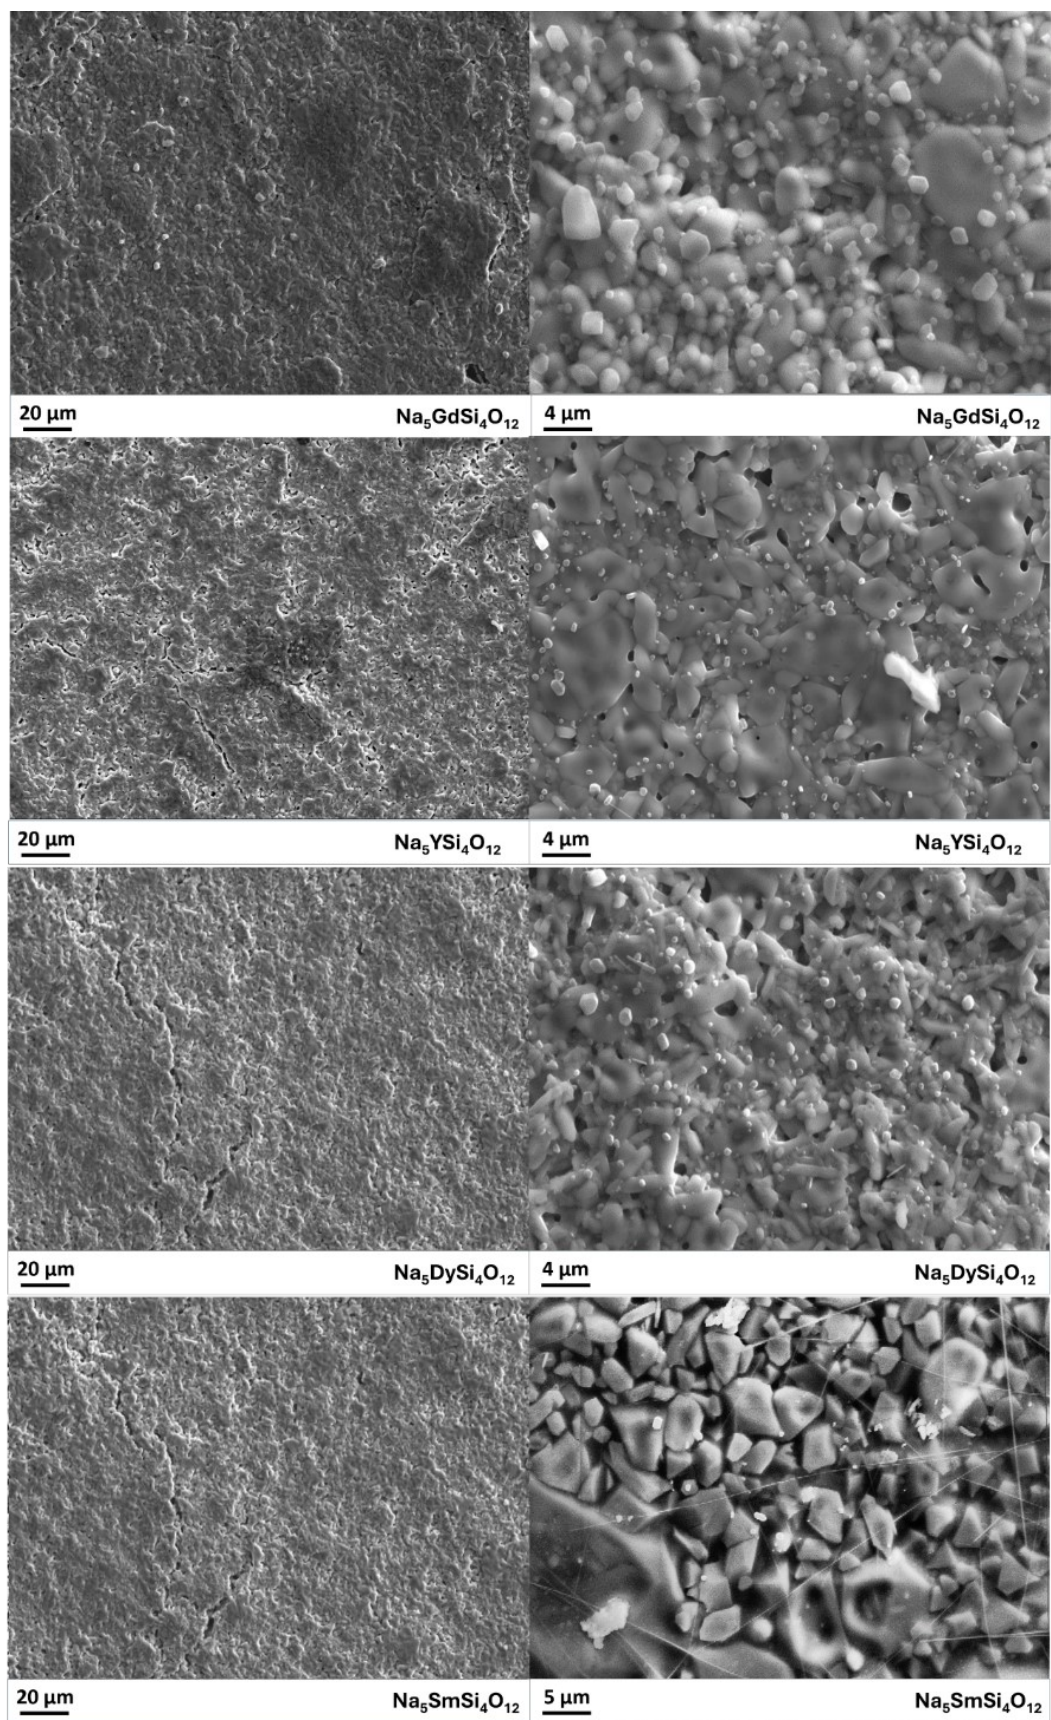

*Figure S2: SEM images of sintered discs of the NMS series.*

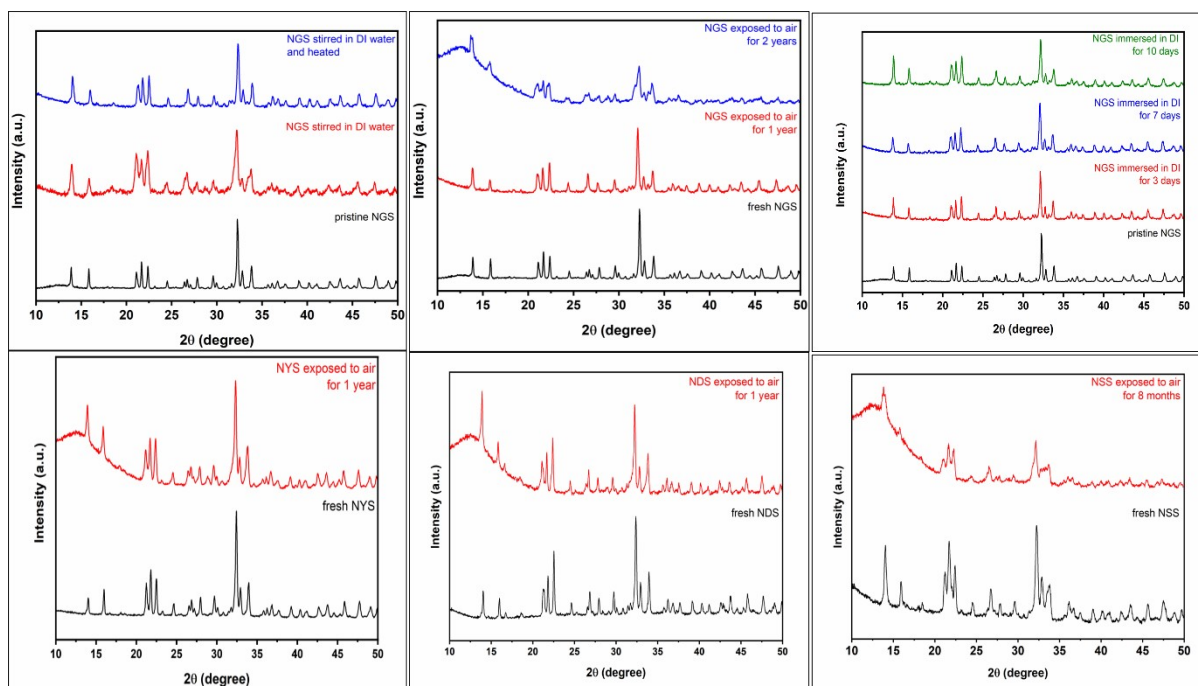

**Figure S3:** XRD patterns of NMS exposed to air and water for different lengths of time

**Table S1:** Ionic conductivities of NMS-type compounds

| T (°C) | Ionic conductivity (S cm <sup>-1</sup> ) |                       |                       |                       |
|--------|------------------------------------------|-----------------------|-----------------------|-----------------------|
|        | NGS                                      | NYS                   | NDS                   | NSS                   |
| 30     | $1.99 \times 10^{-3}$                    | $1.56 \times 10^{-3}$ | $1.99 \times 10^{-3}$ | $6.13 \times 10^{-4}$ |
| 40     | $2.40 \times 10^{-3}$                    | $2.01 \times 10^{-3}$ | $2.59 \times 10^{-3}$ | $8.26 \times 10^{-4}$ |
| 50     | $3.01 \times 10^{-3}$                    | $2.60 \times 10^{-3}$ | $3.34 \times 10^{-3}$ | $1.21 \times 10^{-3}$ |
| 60     | $3.81 \times 10^{-3}$                    | $3.26 \times 10^{-3}$ | $3.88 \times 10^{-3}$ | $1.74 \times 10^{-3}$ |
| 70     | $4.39 \times 10^{-3}$                    | $3.84 \times 10^{-3}$ | $4.34 \times 10^{-3}$ | $2.25 \times 10^{-3}$ |
| 80     | $5.20 \times 10^{-3}$                    | $4.33 \times 10^{-3}$ | $5.69 \times 10^{-3}$ | $2.94 \times 10^{-3}$ |
| 90     | $6.26 \times 10^{-3}$                    | $4.86 \times 10^{-3}$ | $6.46 \times 10^{-3}$ | $3.42 \times 10^{-3}$ |
| 100    | $7.17 \times 10^{-3}$                    | $5.38 \times 10^{-3}$ | $7.09 \times 10^{-3}$ | $4.65 \times 10^{-3}$ |
| 110    | $7.71 \times 10^{-3}$                    | $5.73 \times 10^{-3}$ | $7.68 \times 10^{-3}$ | $5.05 \times 10^{-3}$ |
| 120    | $8.56 \times 10^{-3}$                    | $6.41 \times 10^{-3}$ | $8.09 \times 10^{-3}$ | $5.51 \times 10^{-3}$ |
